# Supplementary material
Source: publisher figshare collection journal article supplement (https://rs.figshare.com/ndownloader/files/12559190)
Supplement: Supplementary file 1 [file 12559190]

## Sheet: shoal cohesion
Dataset: Behaviour of stimulus shoals (shoal cohesion and shoal activity)
Within-shoal phenotypic homogeneity affects shoaling preference in a killifish; Cattelan Silvia and Griggio Matteo (Department of Biology, University of Padova, Italy)
Trial	SampleTime	Homogeneous	Non-Homogeneous
1	1	3	3		‘1’, if all subjects were within one body length from each other
2	1	2	2		‘2’, if two subjects were within one body length from each other
3	1	2	2		‘3’ if the distance among the three subjects was greater than one body length
4	1	3	3
5	1	3	2
6	1	3	2
7	1	3	2
8	1	3	3
9	1	2	3
10	1	3	3
11	1	3	3
12	1	3	3
13	1	3	3
14	1	3	3
15	1	2	2
16	1	3	3
17	1	3	3
18	1	3	3
19	1	3	3
20	1	3	3
21	1	3	3
22	1	3	3
23	1	3	2
24	1	3	2
1	2	3	3
2	2	2	2
3	2	3	2
4	2	3	2
5	2	2	2
6	2	3	1
7	2	1	3
8	2	3	3
9	2	2	3
10	2	1	2
11	2	3	2
12	2	3	3
13	2	3	3
14	2	3	3
15	2	2	1
16	2	3	3
17	2	2	3
18	2	3	3
19	2	2	3
20	2	3	3
21	2	3	3
22	2	3	3
23	2	3	3
24	2	3	2
1	3	3	3
2	3	2	2
3	3	2	3
4	3	2	2
5	3	2	2
6	3	1	3
7	3	2	1
8	3	3	3
9	3	2	3
10	3	2	1
11	3	3	2
12	3	3	3
13	3	2	3
14	3	2	2
15	3	1	2
16	3	3	3
17	3	2	1
18	3	3	3
19	3	3	2
20	3	3	3
21	3	3	3
22	3	3	3
23	3	3	3
24	3	3	2
1	4	3	3
2	4	3	2
3	4	3	3
4	4	2	2
5	4	2	2
6	4	3	3
7	4	2	2
8	4	3	3
9	4	3	3
10	4	2	2
11	4	2	2
12	4	3	3
13	4	3	1
14	4	3	3
15	4	2	2
16	4	3	3
17	4	3	3
18	4	3	3
19	4	3	2
20	4	3	3
21	4	3	3
22	4	3	3
23	4	3	1
24	4	3	2
1	5	3	3
2	5	2	3
3	5	3	2
4	5	3	3
5	5	3	3
6	5	2	2
7	5	3	3
8	5	3	3
9	5	2	1
10	5	2	2
11	5	3	3
12	5	2	2
13	5	3	3
14	5	2	2
15	5	3	3
16	5	3	3
17	5	2	2
18	5	3	3
19	5	3	3
20	5	3	3
21	5	3	3
22	5	3	1
23	5	1	2
24	5	2	3
1	6	2	3
2	6	3	3
3	6	2	3
4	6	3	3
5	6	3	3
6	6	2	2
7	6	2	3
8	6	3	3
9	6	3	2
10	6	2	3
11	6	3	2
12	6	3	3
13	6	3	2
14	6	3	2
15	6	2	2
16	6	3	3
17	6	1	2
18	6	2	2
19	6	3	3
20	6	3	2
21	6	3	3
22	6	2	2
23	6	3	2
24	6	3	3
1	7	3	3
2	7	2	2
3	7	3	3
4	7	2	3
5	7	3	3
6	7	2	2
7	7	2	3
8	7	3	3
9	7	1	3
10	7	3	3
11	7	1	2
12	7	3	2
13	7	3	2
14	7	2	3
15	7	3	3
16	7	3	3
17	7	2	2
18	7	2	2
19	7	3	3
20	7	2	3
21	7	3	2
22	7	3	2
23	7	3	2
24	7	2	2
1	8	3	3
2	8	3	3
3	8	3	2
4	8	3	3
5	8	2	3
6	8	2	3
7	8	3	3
8	8	3	3
9	8	2	3
10	8	2	2
11	8	3	2
12	8	3	3
13	8	2	3
14	8	3	3
15	8	3	2
16	8	2	3
17	8	2	2
18	8	3	2
19	8	3	2
20	8	2	2
21	8	2	2
22	8	2	1
23	8	3	2
24	8	2	2
1	9	3	3
2	9	2	2
3	9	3	3
4	9	3	3
5	9	2	2
6	9	3	3
7	9	3	3
8	9	3	3
9	9	3	3
10	9	3	3
11	9	3	2
12	9	3	3
13	9	3	3
14	9	3	2
15	9	3	3
16	9	3	3
17	9	2	2
18	9	3	3
19	9	3	3
20	9	2	2
21	9	3	2
22	9	3	2
23	9	3	3
24	9	2	2
1	10	3	2
2	10	3	3
3	10	3	3
4	10	2	3
5	10	2	2
6	10	2	1
7	10	2	2
8	10	3	3
9	10	2	2
10	10	1	3
11	10	1	3
12	10	2	2
13	10	3	3
14	10	3	2
15	10	1	2
16	10	2	3
17	10	1	2
18	10	2	3
19	10	3	3
20	10	2	2
21	10	3	3
22	10	3	3
23	10	2	2
24	10	2	2
1	11	3	2
2	11	3	3
3	11	3	3
4	11	2	3
5	11	2	2
6	11	2	3
7	11	2	2
8	11	3	2
9	11	2	3
10	11	3	3
11	11	2	2
12	11	3	3
13	11	2	2
14	11	3	3
15	11	2	3
16	11	1	2
17	11	2	3
18	11	2	2
19	11	3	3
20	11	2	2
21	11	3	2
22	11	3	2
23	11	2	2
24	11	3	2
1	12	2	2
2	12	2	2
3	12	3	2
4	12	3	3
5	12	2	3
6	12	3	2
7	12	2	3
8	12	3	2
9	12	1	1
10	12	2	2
11	12	1	3
12	12	3	2
13	12	2	2
14	12	2	3
15	12	2	3
16	12	3	2
17	12	2	2
18	12	2	2
19	12	2	2
20	12	1	2
21	12	2	2
22	12	3	2
23	12	2	2
24	12	2	3
1	13	2	2
2	13	2	2
3	13	2	2
4	13	3	3
5	13	2	3
6	13	2	2
7	13	1	2
8	13	2	2
9	13	2	2
10	13	2	3
11	13	2	3
12	13	3	2
13	13	3	3
14	13	2	3
15	13	3	3
16	13	2	2
17	13	2	2
18	13	2	2
19	13	3	3
20	13	2	3
21	13	3	2
22	13	3	3
23	13	2	2
24	13	2	3
1	14	2	2
2	14	2	1
3	14	2	2
4	14	3	3
5	14	3	3
6	14	1	3
7	14	2	1
8	14	2	2
9	14	3	3
10	14	3	2
11	14	3	3
12	14	3	3
13	14	3	3
14	14	3	3
15	14	3	3
16	14	2	1
17	14	2	2
18	14	2	2
19	14	3	3
20	14	3	2
21	14	3	3
22	14	3	3
23	14	3	2
24	14	2	3
1	15	2	2
2	15	2	2
3	15	3	2
4	15	3	3
5	15	3	3
6	15	2	2
7	15	3	3
8	15	2	2
9	15	2	3
10	15	2	2
11	15	2	3
12	15	3	2
13	15	2	2
14	15	3	3
15	15	2	3
16	15	2	2
17	15	2	2
18	15	3	1
19	15	2	2
20	15	3	2
21	15	2	3
22	15	3	3
23	15	3	3
24	15	2	3
1	16	1	3
2	16	1	2
3	16	3	1
4	16	3	3
5	16	3	3
6	16	2	2
7	16	2	3
8	16	2	2
9	16	2	1
10	16	2	3
11	16	2	3
12	16	2	3
13	16	1	3
14	16	3	3
15	16	3	3
16	16	2	3
17	16	2	2
18	16	2	3
19	16	3	2
20	16	3	2
21	16	2	2
22	16	3	3
23	16	3	3
24	16	2	3
1	17	2	3
2	17	3	3
3	17	3	3
4	17	3	3
5	17	3	3
6	17	3	2
7	17	3	2
8	17	2	2
9	17	2	3
10	17	2	2
11	17	3	2
12	17	3	2
13	17	2	2
14	17	3	3
15	17	2	3
16	17	1	1
17	17	2	2
18	17	3	3
19	17	3	3
20	17	3	3
21	17	2	2
22	17	2	3
23	17	2	3
24	17	2	3
1	18	3	3
2	18	3	1
3	18	3	3
4	18	3	3
5	18	2	3
6	18	3	3
7	18	2	3
8	18	2	2
9	18	2	1
10	18	3	2
11	18	3	3
12	18	2	3
13	18	3	3
14	18	3	3
15	18	3	3
16	18	2	2
17	18	2	2
18	18	2	2
19	18	3	2
20	18	2	2
21	18	3	3
22	18	2	2
23	18	2	3
24	18	3	3
1	19	3	3
2	19	2	3
3	19	2	3
4	19	3	2
5	19	3	2
6	19	2	2
7	19	2	2
8	19	2	2
9	19	1	2
10	19	2	2
11	19	3	3
12	19	2	3
13	19	2	3
14	19	3	3
15	19	3	3
16	19	2	1
17	19	2	3
18	19	3	3
19	19	2	2
20	19	3	3
21	19	3	2
22	19	2	2
23	19	3	2
24	19	3	3
1	20	3	3
2	20	3	2
3	20	3	2
4	20	2	2
5	20	3	2
6	20	2	2
7	20	3	2
8	20	2	2
9	20	2	3
10	20	3	2
11	20	3	2
12	20	2	2
13	20	2	2
14	20	2	2
15	20	3	2
16	20	3	3
17	20	2	3
18	20	3	3
19	20	3	3
20	20	2	2
21	20	2	2
22	20	3	2
23	20	3	1
24	20	3	3
1	21	3	3
2	21	2	3
3	21	2	3
4	21	2	2
5	21	3	2
6	21	3	2
7	21	3	3
8	21	3	3
9	21	3	3
10	21	2	1
11	21	3	3
12	21	3	3
13	21	3	3
14	21	3	3
15	21	3	2
16	21	2	1
17	21	2	2
18	21	3	3
19	21	3	3
20	21	2	2
21	21	3	3
22	21	3	3
23	21	2	2
24	21	3	3
1	22	3	3
2	22	1	3
3	22	3	2
4	22	2	3
5	22	3	2
6	22	2	3
7	22	3	1
8	22	3	1
9	22	1	2
10	22	3	2
11	22	2	3
12	22	3	3
13	22	2	2
14	22	3	3
15	22	3	2
16	22	3	3
17	22	2	3
18	22	3	2
19	22	3	3
20	22	2	2
21	22	3	2
22	22	3	3
23	22	2	2
24	22	3	3
1	23	3	2
2	23	3	2
3	23	2	3
4	23	3	3
5	23	3	2
6	23	3	3
7	23	3	2
8	23	2	3
9	23	3	3
10	23	3	3
11	23	2	2
12	23	2	2
13	23	1	2
14	23	3	3
15	23	3	3
16	23	1	1
17	23	2	3
18	23	2	2
19	23	3	3
20	23	3	2
21	23	3	2
22	23	3	3
23	23	3	3
24	23	2	2
1	24	3	1
2	24	3	3
3	24	2	3
4	24	3	3
5	24	3	2
6	24	2	2
7	24	3	3
8	24	2	3
9	24	3	2
10	24	2	2
11	24	3	3
12	24	3	2
13	24	3	3
14	24	3	3
15	24	2	2
16	24	2	2
17	24	2	3
18	24	3	3
19	24	2	2
20	24	2	2
21	24	2	2
22	24	2	2
23	24	3	3
24	24	2	3
1	25	2	2
2	25	2	1
3	25	3	2
4	25	3	3
5	25	2	2
6	25	3	2
7	25	3	3
8	25	2	3
9	25	2	3
10	25	2	2
11	25	3	2
12	25	2	2
13	25	2	2
14	25	2	3
15	25	1	3
16	25	2	1
17	25	2	2
18	25	2	3
19	25	2	2
20	25	2	3
21	25	3	2
22	25	3	3
23	25	2	1
24	25	1	2
1	26	3	3
2	26	2	3
3	26	2	2
4	26	3	3
5	26	2	3
6	26	3	2
7	26	1	3
8	26	2	2
9	26	2	2
10	26	1	2
11	26	3	3
12	26	2	3
13	26	3	1
14	26	3	3
15	26	2	2
16	26	3	1
17	26	1	1
18	26	2	3
19	26	3	3
20	26	3	3
21	26	2	2
22	26	2	2
23	26	3	2
24	26	3	2
1	27	3	2
2	27	2	2
3	27	3	3
4	27	3	2
5	27	2	3
6	27	2	2
7	27	1	3
8	27	3	2
9	27	3	3
10	27	2	1
11	27	1	2
12	27	2	1
13	27	2	2
14	27	3	2
15	27	2	3
16	27	2	3
17	27	3	2
18	27	3	2
19	27	2	1
20	27	3	2
21	27	1	2
22	27	3	2
23	27	2	3
24	27	3	1
1	28	3	2
2	28	3	3
3	28	2	3
4	28	3	2
5	28	2	2
6	28	2	3
7	28	3	2
8	28	2	2
9	28	2	2
10	28	2	3
11	28	2	3
12	28	3	3
13	28	3	3
14	28	1	2
15	28	3	2
16	28	1	2
17	28	3	3
18	28	3	2
19	28	2	2
20	28	2	2
21	28	3	3
22	28	3	3
23	28	3	3
24	28	3	2
1	29	3	2
2	29	1	3
3	29	2	2
4	29	1	3
5	29	3	2
6	29	2	3
7	29	2	3
8	29	1	3
9	29	3	2
10	29	3	2
11	29	2	2
12	29	3	2
13	29	3	3
14	29	3	3
15	29	3	2
16	29	3	3
17	29	3	3
18	29	3	2
19	29	2	3
20	29	3	3
21	29	3	3
22	29	2	2
23	29	3	3
24	29	2	1
1	30	2	3
2	30	2	2
3	30	3	1
4	30	2	3
5	30	3	2
6	30	3	3
7	30	2	3
8	30	3	2
9	30	2	3
10	30	2	1
11	30	3	2
12	30	3	3
13	30	2	3
14	30	3	3
15	30	3	2
16	30	2	2
17	30	3	3
18	30	2	2
19	30	1	2
20	30	3	3
21	30	3	3
22	30	2	2
23	30	3	3
24	30	3	3

## Sheet: shoal activity
Dataset: Behaviour of stimulus shoals (shoal cohesion and shoal activity)
Within-shoal phenotypic homogeneity affects shoaling preference in a killifish; Cattelan Silvia and Griggio Matteo (Department of Biology, University of Padova, Italy)
Trial	TSwimAll_Sim	TSwimAll_Dis	TSwimBot_Sim	TSwimBot_Dis	TNoSwim_Sim	TNoSwim_Dis	TTotSwim_Sim	TTotSwim_Dis	SwimAll_Sim	SwimAll_Dis	SwimBot_Sim	SwimBot_Dis	NoSwim_Sim	NoSwim_Dis	TotSwim_Sim	TotSwim_Dis
1	783	722	83	160	84	68	866	882	0.824211	0.76	0.0873684	0.168421	0.0884211	0.0715789	0.911579	0.928421
2	818	747	117	168	15	35	935	915	0.861053	0.786316	0.123158	0.176842	0.0157895	0.0368421	0.984211	0.963158
3	570	617	309	266	71	67	879	883	0.6	0.649474	0.325263	0.28	0.0747368	0.0705263	0.925263	0.929474
4	727	742	195	208	28	0	922	950	0.765263	0.781053	0.205263	0.218947	0.0294737	0	0.970526	1
5	697	750	131	186	122	14	828	936	0.733684	0.789474	0.137895	0.195789	0.128421	0.0147368	0.871579	0.985263
6	735	596	183	321	32	33	918	917	0.773684	0.627368	0.192632	0.337895	0.0336842	0.0347368	0.966316	0.965263
7	696	703	217	224	37	23	913	927	0.732632	0.74	0.228421	0.235789	0.0389474	0.0242105	0.961053	0.975789
8	425	626	413	228	112	96	838	854	0.447368	0.658947	0.434737	0.24	0.117895	0.101053	0.882105	0.898947
9	782	590	115	208	53	152	897	798	0.823158	0.621053	0.121053	0.218947	0.0557895	0.16	0.944211	0.84
10	838	891	112	59	0	0	950	950	0.882105	0.937895	0.117895	0.0621053	0	0	1	1
11	600	801	340	134	10	15	940	935	0.631579	0.843158	0.357895	0.141053	0.0105263	0.0157895	0.989474	0.984211
12	652	773	163	120	135	57	815	893	0.686316	0.813684	0.171579	0.126316	0.142105	0.06	0.857895	0.94
13	770	780	115	132	65	38	885	912	0.810526	0.821053	0.121053	0.138947	0.0684211	0.04	0.931579	0.96
14	790	786	124	139	36	25	914	925	0.831579	0.827368	0.130526	0.146316	0.0378947	0.0263158	0.962105	0.973684
15	649	682	287	264	14	4	936	946	0.683158	0.717895	0.302105	0.277895	0.0147368	0.00421053	0.985263	0.995789
16	533	396	259	434	158	120	792	830	0.561053	0.416842	0.272632	0.456842	0.166316	0.126316	0.833684	0.873684
17	656	772	243	139	51	39	899	911	0.690526	0.812632	0.255789	0.146316	0.0536842	0.0410526	0.946316	0.958947
18	505	692	385	149	60	109	890	841	0.531579	0.728421	0.405263	0.156842	0.0631579	0.114737	0.936842	0.885263
19	809	798	76	87	65	65	885	885	0.851579	0.84	0.08	0.0915789	0.0684211	0.0684211	0.931579	0.931579
20	736	702	100	97	114	151	836	799	0.774737	0.738947	0.105263	0.102105	0.12	0.158947	0.88	0.841053
21	757	701	94	181	99	68	851	882	0.796842	0.737895	0.0989474	0.190526	0.104211	0.0715789	0.895789	0.928421
22	688	695	163	120	99	135	851	815	0.724211	0.731579	0.171579	0.126316	0.104211	0.142105	0.895789	0.857895
23	700	670	108	205	142	75	808	875	0.736842	0.705263	0.113684	0.215789	0.149474	0.0789474	0.850526	0.921053
24	770	666	107	189	73	95	877	855	0.810526	0.701053	0.112632	0.198947	0.0768421	0.1	0.923158	0.9
